# Supplementary material for: Convergent Synthesis of Thioether Containing Peptides
Source: MDPI journal article supplement (doi:10.3390/molecules25010218), 2020-01-05
Supplement: s1 [file s1]

## SUPPLEMENTARY DATA FOR:

# Convergent Synthesis of Thioether Containing Peptides

Spyridon Mourtas <sup>1,2</sup>, Christina Katakalous <sup>1</sup>, Dimitrios Gatos <sup>1</sup> and Kleomenis Barlos <sup>1,3,\*</sup>

<sup>1</sup> Department of Chemistry, University of Patras, 26510 Rio Patras, Greece; s.mourtas@upatras.gr (S.M.); c.katakalous@yahoo.gr (C.K.); d.gatos@upatras.gr (D.G.)

<sup>2</sup> Institute of Chemical Engineering Sciences of the Foundation for Research and Technology Hellas (FORTH/IEC-HT), 26504 Rio Patras, Greece

<sup>3</sup> CBL-Patras, Patras Industrial Area, Block 1, 25018 Patras, Greece.

\* Correspondence: barlos@cblpatras.gr; Tel.: +30-2610-647600; Fax: +30-2610-647316.

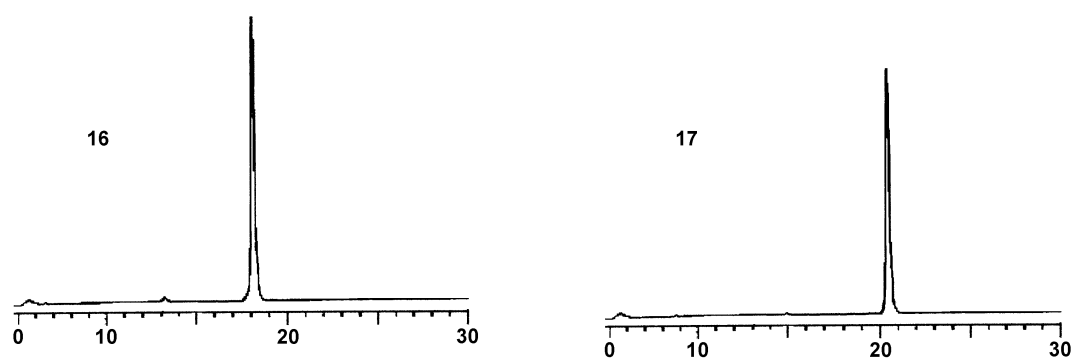

**Figure S1.** Analytical hplc of thioether containing peptides **16** and **17**; Column: Lichrosphere RP-8, 5  $\mu$ m, 4  $\times$  150 mm; flow rate: 1 mL/min; gradient: from 20 to 100% acetonitrile in water within 30 min; detection at 265 nm.

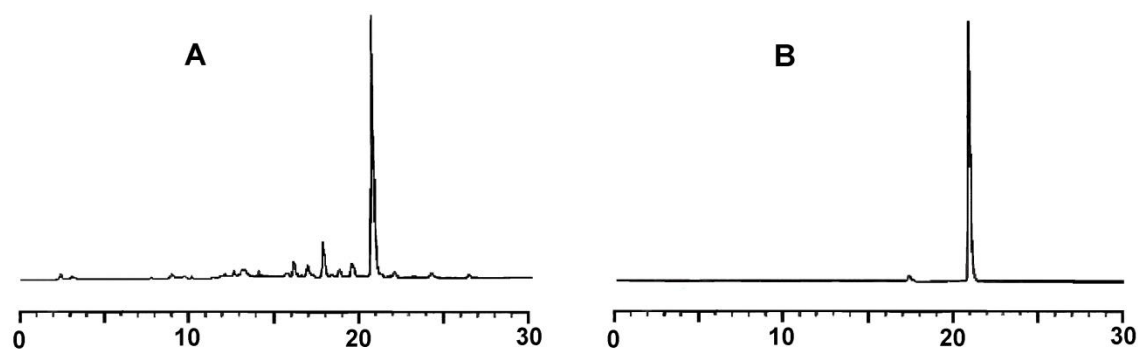

**Figure S2.** Analytical hplc of Fmoc-Leu-alaninothiol prepared by coupling of Fmoc-Leu-OH on the Trt-resin **19** ( $m = 1$ ;  $R' = CH_3$ ) and subsequent cleavage by DTT (A) and TES (B); Column: Nucleosil C8, 7  $\mu$ m, 4  $\times$  125 mm; flow rate: 1 mL/min; gradient: from 50 to 100% acetonitrile in water within 30 min; detection at 265 nm.

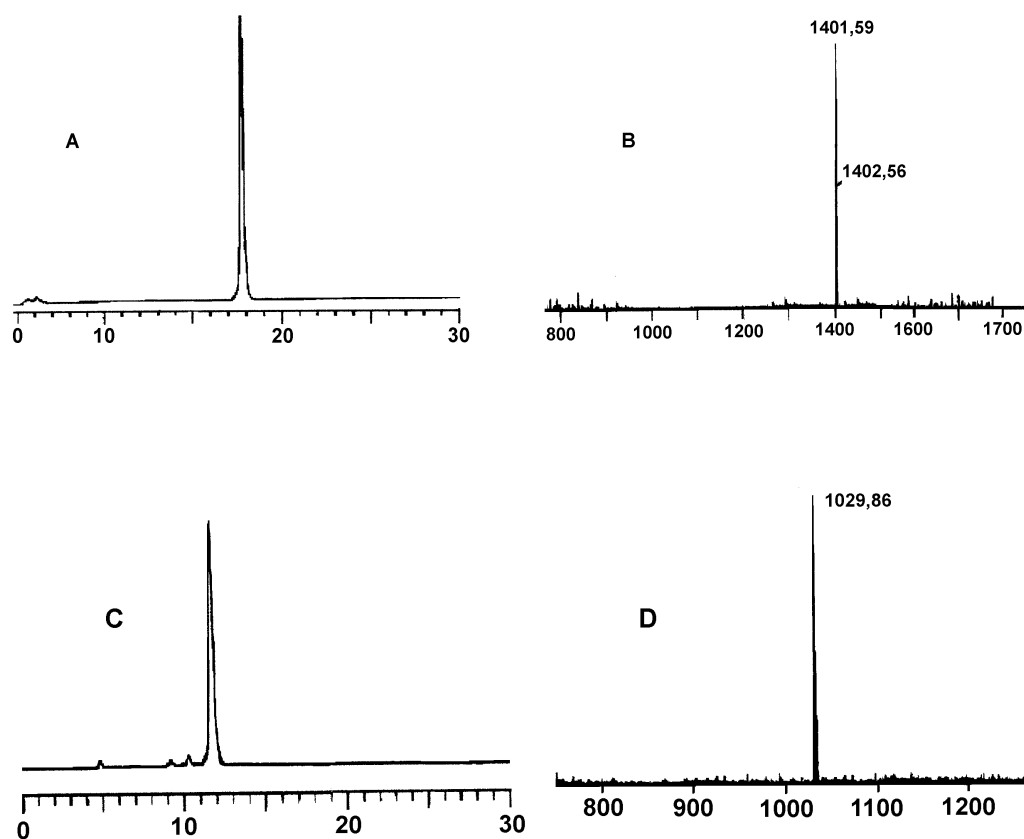

**Figure S3.** Analytical hplc (A) and ESI-MS analysis (B) of thiol-peptide **21** (ProTa (69-75) derivative), and analytical hplc (C) and ESI-MS analysis (D) of thiol-peptide **22** (Hir (11-18) derivative), synthesized on Trt-resin **19** ( $R' = \text{CH}_3$  (**21**);  $-\text{CH}_2\text{-Ph}$  (**22**)); Column: Nucleosil C8, 7  $\mu\text{m}$ , 4  $\times$  125 mm; flow rate: 1 mL/min; gradient: from 50 to 100% acetonitrile in water within 30 min; detection at 265 nm.

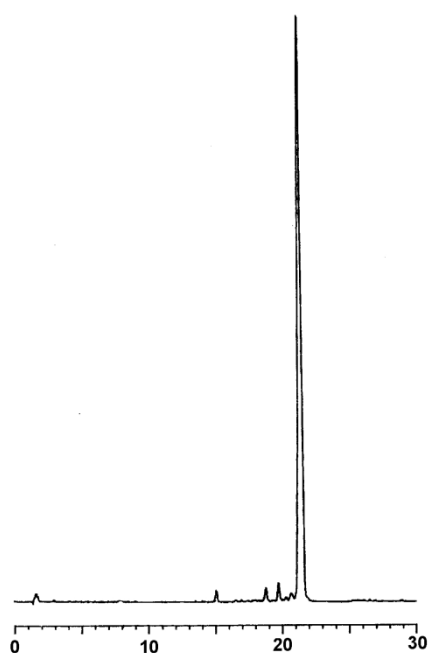

**Figure S4.** Analytical hplc of **26**; Column: Nucleosil C8, 7  $\mu\text{m}$ , 4  $\times$  125 mm; flow rate: 1 mL/min; gradient: from 50 to 100% acetonitrile in water within 30 min; detection at 265 nm.

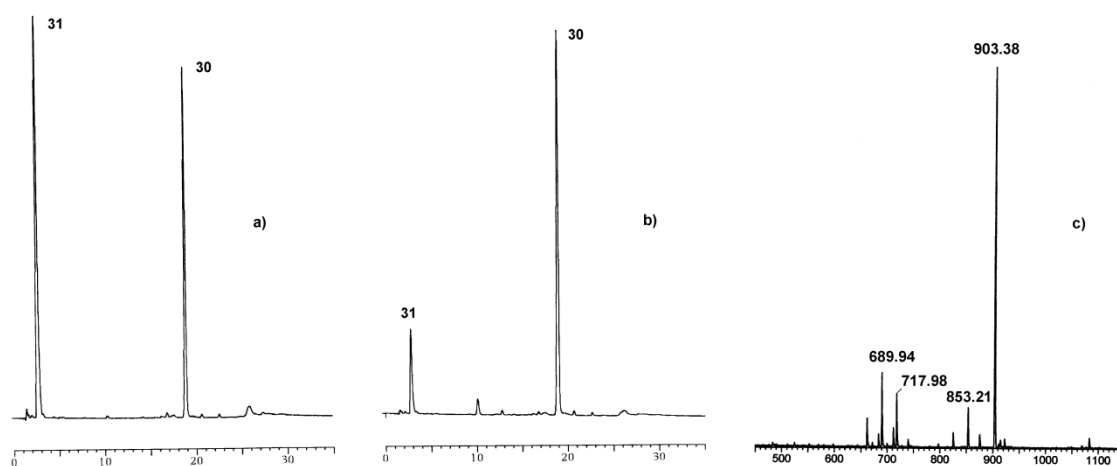

**Figure S5.** Analytical hplc during reaction of **27** and **28** at 2 h (a) and 24 h (b). The reaction process was monitored by following the peaks of the desired product **30** and the un-reacted **31** after their cleavage from resin; Column: Nucleosil C8, 7  $\mu\text{m}$ , 4  $\times$  125 mm; flow rate: 1 mL/min; gradient: from 50 to 100% acetonitrile in water within 30 min; detection at 265 nm; ESI-MS analysis of **30** (c).
